# Supplementary material for: The Prebiotic Kitchen: A Guide to Composing Prebiotic Soup Recipes to Test Origins of Life Hypotheses
Source: Life (Basel). 2021 Nov 11;11(11):1221. doi: 10.3390/life11111221 (PMC8618940; doi:10.3390/life11111221)
Supplement: Supplementary file 1 [file life-11-01221-s001.zip › TableS1.xlsx]

## Sheet: Miller 1955
Miller, S. (1955). Production of some organic compounds under possible primitive Earth conditions. Journal of the American Chemical Society 77(9): 2351-2361. https://doi-org.ezproxy.library.wisc.edu/10.1021/ja01614a001
Amino acids	Mole ratio (rel. gly)	Adjusted concentration (mM)			Molar ratio range	Adjusted concentration (mM)
glycine	1	0.48			0.6-1	0.48
alanine	0.4	0.4			0.06-0.5	0.4
sarcosine	0.4	0.4			0.002-0.05	0.32
β-alanine	0.2	0.4			0.0002-0.001	0.24
α-aminobutyric acid	0.05	0.32			0.00002-0.0001	0.16
α-aminoisobutyric acid (B1)	0.05	0.32			0.000001-0.00001	0.08
β-aminoisobutyric acid (B2)	0.08	0.32
Organic acids	Yield	Mole ratio (rel. gly)	Adjusted concentration (mM)
formic acid	191	3	1.44
acetic acid	75	1	0.48
propionic acid	16	0.2	0.4
glycolic acid	42	0.6	0.4
lactic acid	22	0.3	0.4

## Sheet: Miller and Urey 1959
Miller, S. L., & Urey, H. C. Organic compound synthesis on the primitive earth. Science, 130(3370), 245-251 (1959).
Compound	Yield	Ratio (relative to gly)	Adjusted concentration (mM)		Molar ratio range	Adjusted concentration (mM)
glycine	63	1	0.48		0.6-1	0.48
glycolic acid	56	0.9	0.48		0.06-0.5	0.4
sarcosine	5	0.08	0.4		0.002-0.05	0.32
alanine	34	0.5	0.4		0.0002-0.001	0.24
lactic acid	31	0.5	0.4		0.00002-0.0001	0.16
N-methylalanine	1	0.02	0.32		0.000001-0.00001	0.08
α-aminoisobutyric acid	0.1	0.002	0.32
α-aminobutyric acid	5	0.08	0.4
α-hydroxybutyric acid	5	0.08	0.4
β-alanine	15	0.2	0.4
succinic acid	4	0.06	4
aspartic acid	0.4	0.006	0.32
glutamic acid	0.6	0.01	0.4
iminodiacetic acid	5.5	0.09	0.4
iminoacetic-propionic acid	1.5	0.02	0.32
formic acid	233	3.7	1.92
acetic acid	15	0.2	0.4
propionic acid	13	0.2	0.4
urea	2	0.03	0.32
N-methyl urea	1.5	0.02	0.32

## Sheet: Schlesinger and Miller 1983
Schlesinger, G., & Miller, S. L. Prebiotic synthesis in atmospheres containing CH4, CO, and CO2. Journal of Molecular Evolution, 19(5), 383-390 (1983).
Compound	Yield	Adjusted yield*	Ratio (relative to gly)	Adjusted concentration (mM)		Molar ratio range	Adjusted concentration (mM)
hydrogen cyanide	12	30	0.75	0.48		0.6-1	0.48
formaldehyde	2.5	6.25	0.2	0.4		0.06-0.5	0.4
urea	0.3	0.75	0.02	0.32		0.002-0.05	0.32
						0.0002-0.001	0.24
						0.00002-0.0001	0.16
*based on HCN:glycine ratio reported by Ferus et al. (2007)						0.000001-0.00001	0.08

## Sheet: Ferus et al. 2007
Ferus, M., et al. Formation of nucleobases in a Miller–Urey reducing atmosphere. Proceedings of the National Academy of Sciences, 114(17), 4306-4311 (2017).
Compound	ppm	Ratio (relative to gly)	Adjusted concentration (mM)		ppm ratio range	Adjusted concentration (mM)
glycine	40	1	0.48		0.6-1	0.48
adenine	4	0.1	0.4		0.06-0.5	0.4
guananine	2	0.05	0.32		0.002-0.05	0.32
uracil	1	0.03	0.32		0.0002-0.001	0.24
cytosine	8	0.2	0.32		0.00002-0.0001	0.16
					0.000001-0.00001	0.08

## Sheet: Parker et al. 2011
Parker, E. T., et al. Primordial synthesis of amines and amino acids in a 1958 Miller H2S-rich spark discharge experiment. Proceedings of the National Academy of Sciences, 108(14), 5526-5531 (2011).
Compound	Molar ratio (relative to gly)	Adjusted concentration (mM)		Molar ratio range	Adjusted concentration (mM)
glycine	1	0.48		0.6-1	0.48
alanine	1	0.48		0.06-0.5	0.4
β-alanine	1	0.48		0.002-0.05	0.32
serine	0.05	0.4		0.0002-0.001	0.24
isoserine	0.0001	0.24		0.00002-0.0001	0.16
homocysteic acid	0.0001	0.24		0.000001-0.00001	0.08
β-aminobutyric acid	0.5	0.4
α-aminobutyric acid	0.5	0.4
α-aminoisobutyric acid	0.1	0.4
β-aminoisobutyric acid	0.05	0.4
γ-aminobutyric acid	0.1	0.4
threonine	0.05	0.32
aspartic acid	0.01	0.32
S-methylcysteine	1e-06	0.08
valine	0.5	0.4
glutamic acid	0.01	0.32
isovaline	0.01	0.32
methionine	0.001	0.24
methionine sulfoxide	1e-05	0.16
methionine sulfone	1e-06	0.08
isoleucine	0.05	0.4
leucine	0.01	0.32
ethionine	0.0001	0.24
methylamine	0.01	0.32
ethylamine	0.05	0.32
cysteamine	0.005	0.32
ethanolamine	0.005	0.32
