# Supplementary material for: The Prebiotic Kitchen: A Guide to Composing Prebiotic Soup Recipes to Test Origins of Life Hypotheses
Source: Life (Basel). 2021 Nov 11;11(11):1221. doi: 10.3390/life11111221 (PMC8618940; doi:10.3390/life11111221)
Supplement: Supplementary file 1 [file life-11-01221-s001.zip › TableS2.xlsx]

## Sheet: Sheet1
Compound	Concentration (mM)	Reference(s)
L-glycine	0.48	Parker et al. 2011; Miller 1955; Miller and Urey 1959; Ferus et al. 2017
L-alanine	0.48	Parker et al. 2011; Miller and Urey 1959
β-alanine	0.48	Parker et al. 2011; Miller and Urey 1959
L-serine	0.4	Parker et al. 2011
L-isoserine	0.24	Parker et al. 2011
L-cysteine*	0.48*	Parker et al. 2011
L-β-aminobutyric acid	0.4	Parker et al. 2011
L-α-aminobutyric acid	0.4	Parker et al. 2011; Miller and Urey 1959
L-α-aminoisobutyric acid	0.4	Parker et al. 2011; Miller and Urey 1959
L-α-hydroxybutyric acid	0.4	Miller and Urey 1959
L-β-aminoisobutyric acid	0.4	Parker et al. 2011
L-γ-aminobutyric acid	0.4	Parker et al. 2011
L-threonine	0.32	Parker et al. 2011
L-aspartic acid	0.32	Parker et al. 2011
L-valine	0.4	Parker et al. 2011
L-glutamic acid	0.32	Parker et al. 2011
L-isovaline	0.32	Parker et al. 2011
L-methionine	0.24	Parker et al. 2011
L-isoleucine	0.4	Parker et al. 2011
L-leucine	0.32	Parker et al. 2011
L-ethionine	0.24	Parker et al. 2011
methylamine	0.32	Parker et al. 2011
ethylamine	0.32	Parker et al. 2011
cysteamine	0.32	Parker et al. 2011
ethanolamine	0.32	Parker et al. 2011
sarcosine	0.4	Miller 1955; Miller and Urey 1959
N-methylalanine	0.32	Miller and Urey 1959
formic acid	1.92	Miller 1955; Miller and Urey 1959
acetic acid	0.48	Miller 1955; Miller and Urey 1959
propionic acid	0.4	Miller 1955; Miller and Urey 1959
glycolic acid	0.48	Miller 1955; Miller and Urey 1959
lactic acid	0.4	Miller 1955; Miller and Urey 1959
succininc acid	0.4	Miller and Urey 1959
iminodiacetic acid	0.4	Miller and Urey 1959
hydrogen cyanide	0.48	Schlesinger and Miller 1983
formaldehyde	0.4	Schlesinger and Miller 1983
urea	0.32	Schlesinger and Miller 1983; Miller and Urey 1959
N-methylurea	0.32	Miller and Urey 1959
adenine	0.4	Ferus et al. 2017
thymine	0.32	Ferus et al. 2017
uracil	0.32	Ferus et al. 2017
cytosine	0.32	Ferus et al. 2017
*sum of all sulfur-containing compounds
